# Supplementary material for: NiCo2O4@NiO hybrid arrays with improved electrochemical performance for pseudocapacitors
Source: Royal Society of Chemistry journal article supplement (doi:10.1039/c5ta02429c), 2015-01-01
Supplement: c5ta02429c1.pdf [file c5ta02429c1.pdf]

**Supplementary Information for**  
**NiCo<sub>2</sub>O<sub>4</sub>@NiO Hybrid Arrays with Improved Electrochemical**  
**Performance for Pseudocapacitors**

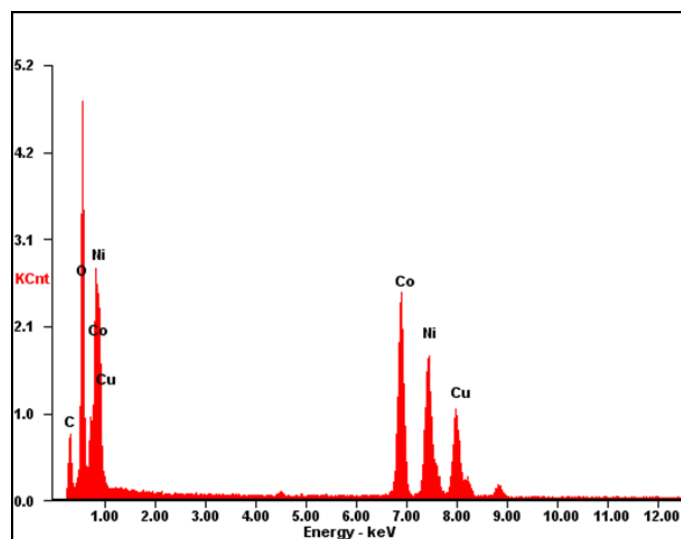

Figure S1 EDX result of the NiCo<sub>2</sub>O<sub>4</sub>@NiO HNW.

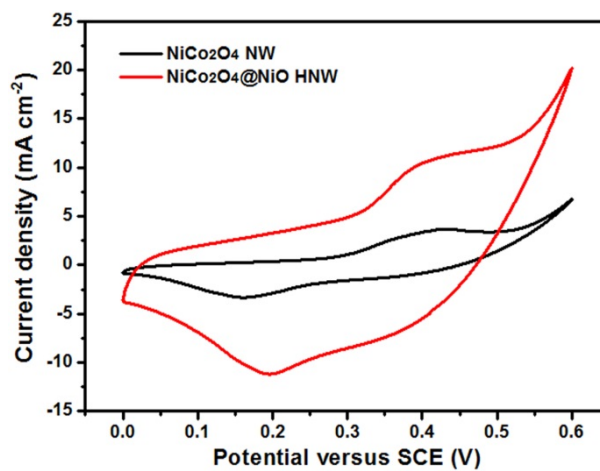

Figure S2 CV curves of NiCo<sub>2</sub>O<sub>4</sub> NW and NiCo<sub>2</sub>O<sub>4</sub>@NiO HNW.

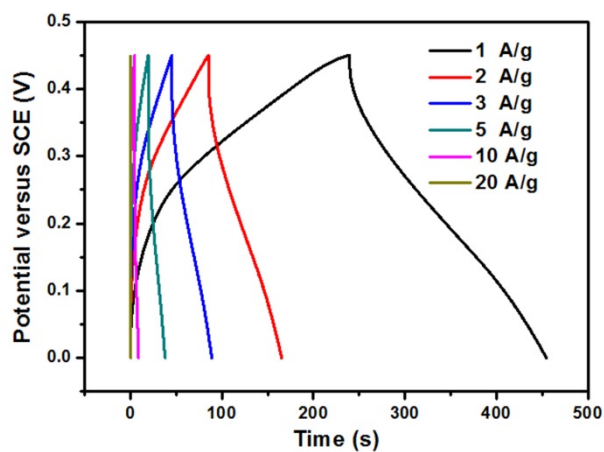

Figure S3 charge–discharge curves of the  $\text{NiCo}_2\text{O}_4$  NW at various current densities.

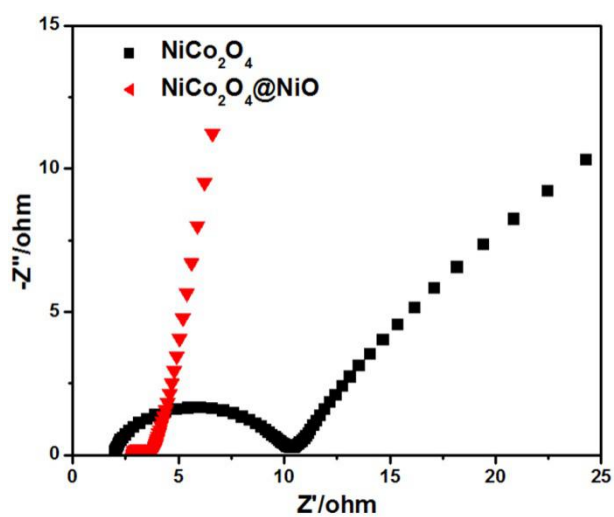

Figure S4 Nyquist plots of  $\text{NiCo}_2\text{O}_4$  NW and  $\text{NiCo}_2\text{O}_4@$ NiO HNW.
